# Supplementary material for: Spontaneous atopic dermatitis in mice with a defective skin barrier is independent of ILC2 and mediated by IL‐1β
Source: PubMed Central journal article supplement (PMC6850072; doi:10.1111/all.13801), 2019-04-29
Supplement: ALL-74-1920-s001.pdf [file ALL-74-1920-s001.pdf]

## Material and Methods

### *Flow cytometry*

Cells were stained with Live/Dead aqua (Life Technologies) in PBS for 30 min at 4°C and Fc receptors were then blocked with 10 µg/ml purified anti-CD16/32 antibody (clone 93; eBioscience) in FACS buffer (PBS, 2% FBS, and Na<sub>3</sub>N) for 15 min at 4°C. Cells were incubated in FACS buffer for 30 min at 4°C with combinations of antibodies listed in Supplementary Table 1.

ILC2 were defined as Lin<sup>-</sup>CD45<sup>+</sup>CD90<sup>+</sup>ST2<sup>+</sup>KLRG1<sup>+</sup>, mast cells as CD45<sup>+</sup>CD117<sup>+</sup>IgE<sup>+</sup>/FcεRIα<sup>+</sup>, eosinophils as CD45<sup>+</sup>Siglec-F<sup>+</sup>CD11b<sup>+</sup>, basophils as CD45<sup>+</sup>IgE<sup>+</sup>CD200R3<sup>+</sup>CD117. Cells were acquired on a DAKO CyanADP machine and analyzed with FlowJo software (Treestar).

### *MC903-induced skin inflammation*

MC903 (Calcipotriol) was dissolved in 100% ethanol and 4 nmol in 20 µl applied daily onto the ears of wildtype mice for a total of 5-7 days, as previously described (Li, 2006). *Flg<sup>ft/ft</sup>* mice received low-dose (1 nmol) MC903 to account for increased skin permeability. Ear thickness was measured daily with a thickness gauge (Mitutoyo).

### *Antibody treatment of *Flg<sup>ft/ft</sup>* mice*

*Flg<sup>ft/ft</sup>* mice received daily intraperitoneal injections of 200 µg of anti-IL-1α (clone ALF-161; BioXCell, USA), anti-IL-1β (clone B122; BioXCell, USA) and isotype control mAb (clone MOPC-21; BioXCell, USA) on Day -1 to Day 4. Analysis of mice was performed 24 hours after the last MC903 application.

### *Histology*

Skin tissue samples were fixed in 10% neutral buffered formalin, embedded in paraffin, and 4-µm slices were cut on a microtome before staining with hematoxylin/eosin, chloroacetate esterase, or toluidine blue. Pictures were acquired on an Aperio ScanScope at 20x original magnification.

### *Transepidermal water loss*

Measurement of transepidermal water loss (TEWL) was measured using a Courage and Khazaka Tewameter TM210 (EnviroDerm, Evesham, UK), as previously described (Fallon, 2009). TEWL was recorded at room temperatures of 19-21°C and 50 +/-5 % relative humidity.

### *Human suction blister studies*

Studies on AD patients were as described (Salimi, 2013; Saunders, 2016). Suction blistering was performed on patients with informed written consent, and sample use was given ethical approval from the NRES Committee South Central, United Kingdom. IL-1β in Blister fluid was analyzed with the MAGPIX Multiplex Array (Luminex, Austin, Tex), according to the manufacturer's instructions.

### *Measurement of proteins*

Commercial ELISA kits were used for quantification of total serum IgE (BD Pharmingen), Mcpt1, and cytokines (R&D Systems, Minneapolis, MN). Skin tissue was homogenized in a buffer containing 1 X PBS, 2% fetal bovine serum and 0.5% cetyltrimethylammonium bromide, using an IKA T10 Basic Ultra-Turrax homogenizer. Homogenates were centrifuged at 13000 g for 15 min. Cytokines were determined using ELISA kits or V-PLEX Mouse Cytokine kit (Meso Scale Discovery). Cytokine levels were normalized to total protein following BCA assay.

### *Antibiotics treatment*

*Flg<sup>ft/ft</sup>* mice were treated with a broad-spectrum antibiotic (ABX) treatment protocol (Hill, 2010; Floudas, 2017). Pregnant *Flg<sup>ft/ft</sup>* mice were administered ABX orally daily from for 10 consecutive days, from E14 to P5, with vancomycin (0.5mg/ml), neomycin (1mg/ml), metronidazole (1mg/ml), ampicillin (1mg/ml) and gentamicin (1mg/ml) (Sigma-Aldrich) in autoclaved water. Cages were maintained on ABX-supplemented drinking water - metronidazole (0.5 mg/ml) and ciprofloxacin (0.125 mg/ml) - until weaning at P21. For ABX treatment of adult mice, 8-9 week old *Flg<sup>ft/ft</sup>* mice were scored for skin inflammation and randomly assigned to ABX or control groups. Mice were treated with ABX regime and *control mice* were treated orally with autoclaved water daily by oral gavage for 10 days.

## Supplemental references

Fallon PG, Sasaki T, Sandilands A, et al. A homozygous frameshift mutation in the mouse Flg gene facilitates enhanced percutaneous allergen priming. *Nat Genet.* 2009;41(5):602-608.

Floudas A, Saunders SP, Moran T, et al. IL-17 Receptor A Maintains and Protects the Skin Barrier To Prevent Allergic Skin Inflammation. *J Immunol.* 2017;199(2):707-717.

Hill DA, Hoffmann C, Abt MC, et al. Metagenomic analyses reveal antibiotic-induced temporal and spatial changes in intestinal microbiota with associated alterations in immune cell homeostasis. *Mucosal Immunol.* 2010;3(2):148-158.

Li M, Hener P, Zhang Z, Kato S, Metzger D, Chambon P. Topical vitamin D3 and low-calcemic analogs induce thymic stromal lymphopoietin in mouse keratinocytes and trigger an atopic dermatitis. *Proc Natl Acad Sci U S A.* 2006;103(31):11736-11741

Salimi M, Barlow JL, Saunders SP, et al. A role for IL-25 and IL-33-driven type-2 innate lymphoid cells in atopic dermatitis. *J Exp Med.* 2013;210(13):2939-2950.

Saunders SP, Moran T, Floudas A, et al. Spontaneous atopic dermatitis is mediated by innate immunity, with the secondary lung inflammation of the atopic march requiring adaptive immunity. *J Allergy Clin Immunol.* 2016;137(2):482-491.

## Supplemental table 1:

### Antibodies used for flow cytometry staining

|          | Specificity | Clone          | Fluorochrome  | Company        |
|----------|-------------|----------------|---------------|----------------|
| lineage  | CD3         | 17A2           | eFlour 450    | ebioscience    |
|          | TCRb        | H57-597        | eFlour 450    | ebioscience    |
|          | CD5         | 53-7.3         | eFlour 450    | ebioscience    |
|          | CD19        | ebio1D3        | eFlour 450    | ebioscience    |
|          | gd TCR      | ebioGL3        | eFlour 450    | ebioscience    |
|          | CD11b       | M1/70          | eFlour 450    | ebioscience    |
|          | CD11c       | N418           | eFlour 450    | ebioscience    |
|          | FcER1a      | MAR-1          | eFlour 450    | ebioscience    |
|          | Ter-119     | TER119         | eFlour 450    | ebioscience    |
|          | Gr-1        | RB6-8C5        | eFlour 450    | ebioscience    |
|          | F4/80       | BM8            | eFlour 450    | ebioscience    |
|          | T1/ST2      | DJ8            | FITC          | MD Biosciences |
|          | CD274       | MIH5           | PE            | ebioscience    |
|          | KLRG1       | 2F1            | PE-eFlour 610 | ebioscience    |
|          | CD25        | PC61.5         | APC           | ebioscience    |
| CD45     | 30-F11      | PerCP-Cy5.5    | BD            |                |
| CD45     | 104         | PE-CF594       | BD            |                |
| Siglec-F | E50-2440    | PE             | BD            |                |
| MHC2     | M5/114.15.2 | FITC           | ebioscience   |                |
| MHC2     | M5/114.15.2 | eFlour 450     | ebioscience   |                |
| MHC2     | M5/114.15.2 | APC-eFlour 780 | ebioscience   |                |
| CD3      | 145-2C11    | APC            | ebioscience   |                |
| CD3      | 145-2C11    | PE-eFlour 610  | ebioscience   |                |
| CD3      | 17A2        | FITC           | ebioscience   |                |
| CD4      | RM4-5       | APC            | ebioscience   |                |
| CD4      | RM4-5       | APC-eFlour 780 | ebioscience   |                |
| CD4      | RM4-5       | PerCP-Cy5.5    | ebioscience   |                |
| CD11b    | M1/70       | PerCP-Cy5.5    | ebioscience   |                |
| CD11c    | N418        | PE-Cy7         | ebioscience   |                |
| CD11c    | N418        | eFlour 450     | ebioscience   |                |
| F4/80    | BM8         | FITC           | ebioscience   |                |
| F4/80    | BM8         | APC            | ebioscience   |                |
| CD200R3  | Ba13        | PE             | BioLegend     |                |
| IgE      | 23G3        | FITC           | ebioscience   |                |
| IgE      | 23G3        | PE             | ebioscience   |                |
| CD117    | 2B8         | PE             | ebioscience   |                |
| FcER1a   | MAR-1       | FITC           | ebioscience   |                |
| FcER1a   | MAR-1       | eFlour 450     | ebioscience   |                |

#### Staining of transcription factors

|                           |         |                      |             |
|---------------------------|---------|----------------------|-------------|
| FoxP3 staining buffer kit |         |                      | ebioscience |
| GATA3                     | TWAJ    | PE                   | ebioscience |
| Tbet                      | 04-46   | FITC                 | BD          |
| Tbet                      | 04-46   | APC                  | BD          |
| RORgT                     | Q31-378 | Brilliant Violet 421 | BD          |
| FoxP3                     | MF23    | APC                  | BD          |
| FoxP3                     | MF23    | PE-CF594             | BD          |



# Supplemental figure 2

(A)

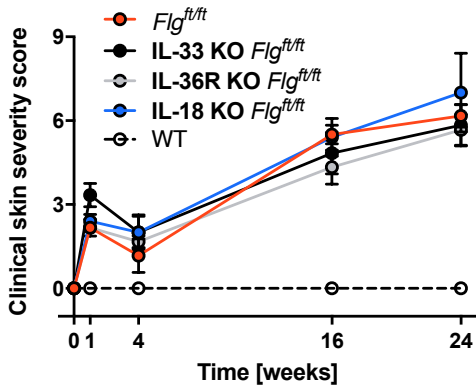

(B)

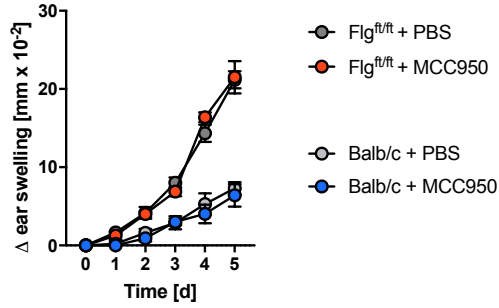

## Supplemental Figure 2. Inflammasome-independent inflammation.

(A) Macroscopic clinical scoring of *Flg<sup>fl/fl</sup>* (red), IL-18<sup>-/-</sup>*Flg<sup>fl/fl</sup>* (black), IL-36R<sup>-/-</sup>*Flg<sup>fl/fl</sup>* (light blue) and IL-33<sup>-/-</sup>*Flg<sup>fl/fl</sup>* (blue) mice. Graph shows the mean+SEM of six mice per group.

(B) Balb/c and *Flg<sup>fl/fl</sup>* mice were treated with PBS (gray circles) or inflammasome inhibitor MCC950 (red: *Flg<sup>fl/fl</sup>*, blue: Balb/c) and MCC950 was topically applied to induce dermatitis exacerbation. Ear thickness was measured daily. Graph shows the mean+SD of 4-6 mice per group.
